# Supplementary material
Source: Springer Nature journal article supplement (https://www.springermedizin.de/resource/supplementary/12947_2004_33_MOESM2_ESM.pdf/9556040)

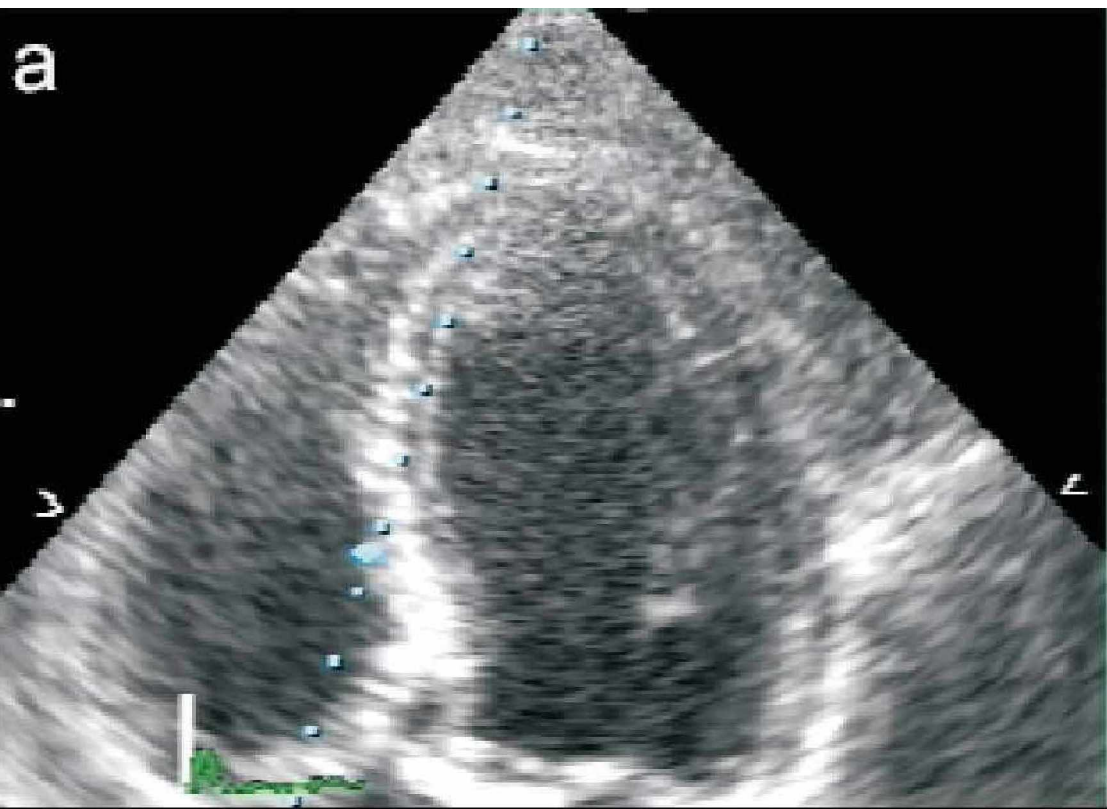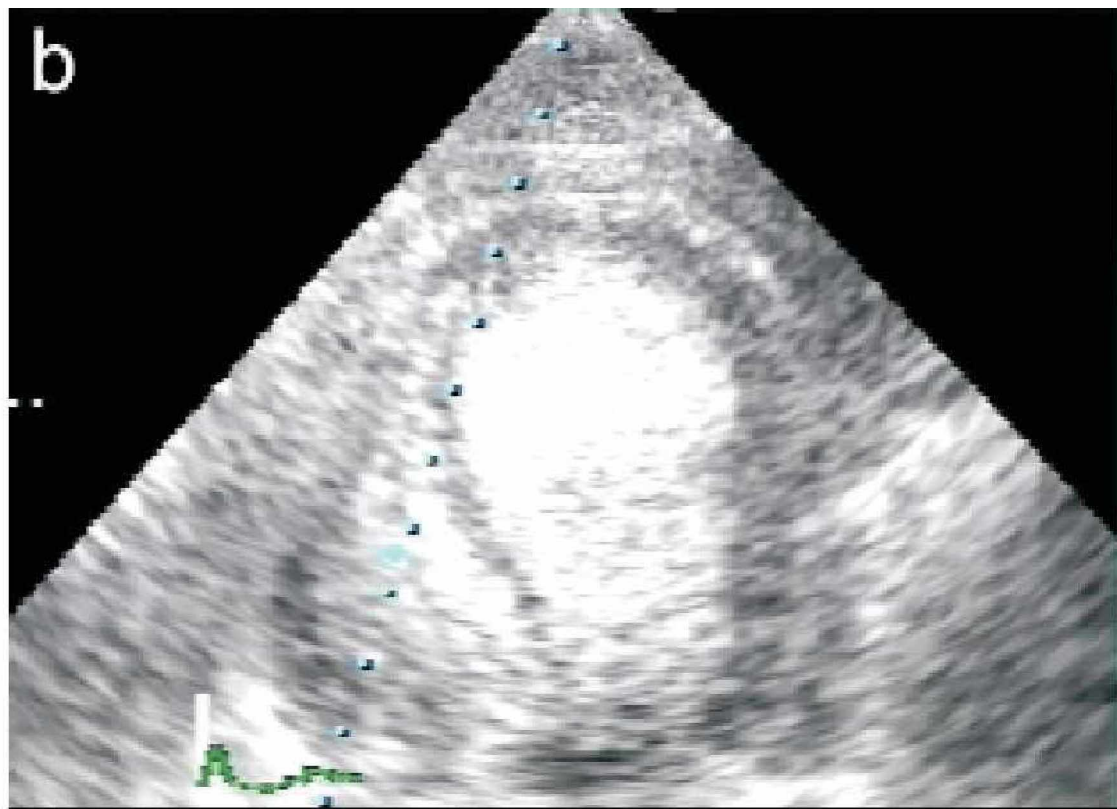

Supplement: MOESM2 [file 9556040]
